# Supplementary material for: Evolution of the B3 DNA Binding Superfamily: New Insights into REM Family Gene Diversification
Source: PLoS One. 2009 Jun 8;4(6):e5791. doi: 10.1371/journal.pone.0005791 (PMC2688026; doi:10.1371/journal.pone.0005791)
Supplement: Table S5 — List of B3 genes found by additional resources and putative domain found. List of the additional B3 genes found by Swaminathan et al. [30] for Arabidopsis and rice. Identification of domain and E-value was conducted in Pfam analysis. Genes with putative B3 domains or other DUF domain with not significant E-value were not included in our analysis. Asteristics represents pseudogenes described by TAIR. (0.03 MB XLS) [file pone.0005791.s009.xls]

## Sheet: Age stimation B3 
A. thaliana		dS	YA	MYA
AT1G34390.1	AT1G34410.1	0.0816	2.72e+06	2.72
AT4G01580.1	AT1G49475.1	1.6218	54060000	54.06
AT2G46530.3	AT3G61830.1	0.9227	3.07567e+07	30.7567
AT4G31620.1	AT4G31615.1	0.4253	1.41767e+07	14.1767
AT2G24650.1	AT4G00260.1	0.1281	4270000	4.27
AT5G25475.1	AT5G25470.2	0.3671	1.22367e+07	12.2367
AT3G06220.1	AT3G06160.1	0.4476	1.492e+07	14.92
AT5G60130.1	AT5G60140.1	0.6713	2.23767e+07	22.3767
AT3G11580.2	AT5G06250.1	1.025	3.41667e+07	34.1667
AT2G16210.2	AT2G35310.1	0.7004	2.33467e+07	23.3467
AT1G25560.1	AT1G68840.1	0.8846	2.94867e+07	29.4867
AT1G13260.1	AT3G25730.1	0.6942	2.314e+07	23.14
AT4G31680.1	AT4G31690.1	0.2408	8.02667e+06	8.02667
AT5G18090.1	AT5G18000.1	0.5373	17910000	17.91
AT3G61970.1	AT2G46870.1	1.5275	5.09167e+07	50.9167
O. sativa		dS	YA	MYA
Os11g32110.4	Os12g29520.2	0.8633	6.64077e+07	66.4077
Os04g36054.1	Os02g35140.1	0.8197	6.30538e+07	63.0538
Os04g58000.1	Os04g58010.1	0.4538	3.49077e+07	34.9077
Os05g47650.1	Os01g49830.1	1.9705	1.51577e+08	151.577
Os05g43920.1	Os01g54990.1	0.6974	5.36462e+07	53.6462
Os06g48950.1	Os08g40900.2	1.6701	1.28469e+08	128.469
Os07g08530.1	Os07g08540.1	0.2417	1.85923e+07	18.5923
Os02g06910.1	Os06g46410.1	0.8461	6.50846e+07	65.0846
Os01g48060.3	Os05g48870.3	0.565	4.34615e+07	43.4615
Os01g04800.1	Os01g04750.1	0.931	7.16154e+07	71.6154
Os04g27960.1	Os04g27990.1	0.3959	3.04538e+07	30.4538
Os03g42250.1	Os03g42240.1	0.6004	4.61846e+07	46.1846
Os03g42420.1	Os03g42430.1	0.4227	3.25154e+07	32.5154
Os12g40090.1	Os12g40120.1	0.2371	1.82385e+07	18.2385
Os12g40070.1	Os12g40080.1	0.807	6.20769e+07	62.0769
Os03g42370.1	Os03g42410.1	0.7124	54800000	54.8
Populus		dS	YA	MYA
PT282057.1	PT282058.1	1.7716	1.36277e+08	136.277
PT595068.1	PT768360.1	0.2399	1.84538e+07	18.4538
PT765287.1	PT833860.1	0.1963	15100000	15.1
PT783236.1	PT591695.1	1.1127	8.55923e+07	85.5923
PT784500.1	PT770235.1	0.6351	4.88538e+07	48.8538
PT589324.1	PT778677.1	0.2971	2.28538e+07	22.8538
PT574779.1	PT593334.1	0.4265	3.28077e+07	32.8077
PT755009.1	PT286795.1	1.1459	8.81462e+07	88.1462
PT595684.1	PT775729.1	0.6472	4.97846e+07	49.7846
PT262733.1	PT762896.1	0.352	2.70769e+07	27.0769
PT289219.1	PT198791.1	0.1852	1.42462e+07	14.2462
Physcomitrella		dS	YA	MYA
PH168019.1	PH127416.1	1.032	3.44e+07	34.4
PH127167.1	PH33929.1	1.3454	4.48467e+07	44.8467
PH47563.1	PH113682.1	1.4571	4.857e+07	48.57
PH84275.1	PH88498.1	0.7909	2.63633e+07	26.3633
PH131154.1	PH135391.1	0.4186	1.39533e+07	13.9533
